# Supplementary material
Source: PubMed Central journal article supplement (PMC11318089)
Supplement: NIHMS2014702-supplement-supplemental.pdf [file NIHMS2014702-supplement-supplemental.pdf]

## Supplemental Information

| <b>SUPPLEMENTAL TABLE 4</b> Prevalence of GIP Pathogens Detected, in Descending Order                                                                                                                                                                                                                                                                                                                                                                                                                                                                                                                                                                                                                                                                                                                                                                                                                                                                                                                                                                                                                                                                                                                                                                                                                                                                |                    |
|------------------------------------------------------------------------------------------------------------------------------------------------------------------------------------------------------------------------------------------------------------------------------------------------------------------------------------------------------------------------------------------------------------------------------------------------------------------------------------------------------------------------------------------------------------------------------------------------------------------------------------------------------------------------------------------------------------------------------------------------------------------------------------------------------------------------------------------------------------------------------------------------------------------------------------------------------------------------------------------------------------------------------------------------------------------------------------------------------------------------------------------------------------------------------------------------------------------------------------------------------------------------------------------------------------------------------------------------------|--------------------|
| <b>Pathogen</b>                                                                                                                                                                                                                                                                                                                                                                                                                                                                                                                                                                                                                                                                                                                                                                                                                                                                                                                                                                                                                                                                                                                                                                                                                                                                                                                                      | <b>N (%)</b>       |
| <b>Bacteria<sup>a</sup></b>                                                                                                                                                                                                                                                                                                                                                                                                                                                                                                                                                                                                                                                                                                                                                                                                                                                                                                                                                                                                                                                                                                                                                                                                                                                                                                                          | <b>272 (24.2%)</b> |
| <i>C. difficile</i>                                                                                                                                                                                                                                                                                                                                                                                                                                                                                                                                                                                                                                                                                                                                                                                                                                                                                                                                                                                                                                                                                                                                                                                                                                                                                                                                  | 163 (14.5%)        |
| <i>Salmonella</i>                                                                                                                                                                                                                                                                                                                                                                                                                                                                                                                                                                                                                                                                                                                                                                                                                                                                                                                                                                                                                                                                                                                                                                                                                                                                                                                                    | 47 (4.2%)          |
| Shiga-like toxin-producing <i>E. coli</i> / <i>E. coli</i> 0157                                                                                                                                                                                                                                                                                                                                                                                                                                                                                                                                                                                                                                                                                                                                                                                                                                                                                                                                                                                                                                                                                                                                                                                                                                                                                      | 32 (2.8%)          |
| <i>Campylobacter</i>                                                                                                                                                                                                                                                                                                                                                                                                                                                                                                                                                                                                                                                                                                                                                                                                                                                                                                                                                                                                                                                                                                                                                                                                                                                                                                                                 | 25 (2.2%)          |
| <i>Shigella/enteroinvasive E. coli</i>                                                                                                                                                                                                                                                                                                                                                                                                                                                                                                                                                                                                                                                                                                                                                                                                                                                                                                                                                                                                                                                                                                                                                                                                                                                                                                               | 10 (0.9%)          |
| <i>Plesiomonas shigelloides</i>                                                                                                                                                                                                                                                                                                                                                                                                                                                                                                                                                                                                                                                                                                                                                                                                                                                                                                                                                                                                                                                                                                                                                                                                                                                                                                                      | 1 (0.1%)           |
| <i>Vibrio</i>                                                                                                                                                                                                                                                                                                                                                                                                                                                                                                                                                                                                                                                                                                                                                                                                                                                                                                                                                                                                                                                                                                                                                                                                                                                                                                                                        | 0 (0%)             |
| <i>Yersinia enterocolitica</i>                                                                                                                                                                                                                                                                                                                                                                                                                                                                                                                                                                                                                                                                                                                                                                                                                                                                                                                                                                                                                                                                                                                                                                                                                                                                                                                       | 0 (0%)             |
| <b>Virus</b>                                                                                                                                                                                                                                                                                                                                                                                                                                                                                                                                                                                                                                                                                                                                                                                                                                                                                                                                                                                                                                                                                                                                                                                                                                                                                                                                         | <b>434 (38.6%)</b> |
| Norovirus                                                                                                                                                                                                                                                                                                                                                                                                                                                                                                                                                                                                                                                                                                                                                                                                                                                                                                                                                                                                                                                                                                                                                                                                                                                                                                                                            | 216 (19.2%)        |
| Rotavirus                                                                                                                                                                                                                                                                                                                                                                                                                                                                                                                                                                                                                                                                                                                                                                                                                                                                                                                                                                                                                                                                                                                                                                                                                                                                                                                                            | 92 (8.2%)          |
| Adenovirus                                                                                                                                                                                                                                                                                                                                                                                                                                                                                                                                                                                                                                                                                                                                                                                                                                                                                                                                                                                                                                                                                                                                                                                                                                                                                                                                           | 58 (5.2%)          |
| Sapovirus                                                                                                                                                                                                                                                                                                                                                                                                                                                                                                                                                                                                                                                                                                                                                                                                                                                                                                                                                                                                                                                                                                                                                                                                                                                                                                                                            | 57 (5.1%)          |
| Astrovirus                                                                                                                                                                                                                                                                                                                                                                                                                                                                                                                                                                                                                                                                                                                                                                                                                                                                                                                                                                                                                                                                                                                                                                                                                                                                                                                                           | 48 (4.3%)          |
| <b>Parasite</b>                                                                                                                                                                                                                                                                                                                                                                                                                                                                                                                                                                                                                                                                                                                                                                                                                                                                                                                                                                                                                                                                                                                                                                                                                                                                                                                                      | <b>23 (2.0%)</b>   |
| <i>Giardia lamblia</i>                                                                                                                                                                                                                                                                                                                                                                                                                                                                                                                                                                                                                                                                                                                                                                                                                                                                                                                                                                                                                                                                                                                                                                                                                                                                                                                               | 12 (1.1%)          |
| <i>Cryptosporidium</i>                                                                                                                                                                                                                                                                                                                                                                                                                                                                                                                                                                                                                                                                                                                                                                                                                                                                                                                                                                                                                                                                                                                                                                                                                                                                                                                               | 11 (1.0%)          |
| <i>Cyclospora cayetanensis</i>                                                                                                                                                                                                                                                                                                                                                                                                                                                                                                                                                                                                                                                                                                                                                                                                                                                                                                                                                                                                                                                                                                                                                                                                                                                                                                                       | 0 (0%)             |
| <i>Entamoeba histolytica</i>                                                                                                                                                                                                                                                                                                                                                                                                                                                                                                                                                                                                                                                                                                                                                                                                                                                                                                                                                                                                                                                                                                                                                                                                                                                                                                                         | 0 (0%)             |
| Actionable result (bacteria or parasite detected)                                                                                                                                                                                                                                                                                                                                                                                                                                                                                                                                                                                                                                                                                                                                                                                                                                                                                                                                                                                                                                                                                                                                                                                                                                                                                                    | 278 (24.7%)        |
| When excluding <i>C. difficile</i> in ages <2 y                                                                                                                                                                                                                                                                                                                                                                                                                                                                                                                                                                                                                                                                                                                                                                                                                                                                                                                                                                                                                                                                                                                                                                                                                                                                                                      | 234 (20.8%)        |
| When excluding <i>C. difficile</i> in ages <3 y                                                                                                                                                                                                                                                                                                                                                                                                                                                                                                                                                                                                                                                                                                                                                                                                                                                                                                                                                                                                                                                                                                                                                                                                                                                                                                      | 218 (19.4%)        |
| When excluding <i>C. difficile</i> with viral coinfection                                                                                                                                                                                                                                                                                                                                                                                                                                                                                                                                                                                                                                                                                                                                                                                                                                                                                                                                                                                                                                                                                                                                                                                                                                                                                            | 213 (19.0%)        |
| Non- <i>C. difficile</i> bacteria and parasites only                                                                                                                                                                                                                                                                                                                                                                                                                                                                                                                                                                                                                                                                                                                                                                                                                                                                                                                                                                                                                                                                                                                                                                                                                                                                                                 | 127 (11.3%)        |
| Nonactionable result (virus only)                                                                                                                                                                                                                                                                                                                                                                                                                                                                                                                                                                                                                                                                                                                                                                                                                                                                                                                                                                                                                                                                                                                                                                                                                                                                                                                    | 348 (31.0%)        |
| Any positive result                                                                                                                                                                                                                                                                                                                                                                                                                                                                                                                                                                                                                                                                                                                                                                                                                                                                                                                                                                                                                                                                                                                                                                                                                                                                                                                                  | 626 (55.7%)        |
| >1 pathogen type detected                                                                                                                                                                                                                                                                                                                                                                                                                                                                                                                                                                                                                                                                                                                                                                                                                                                                                                                                                                                                                                                                                                                                                                                                                                                                                                                            | 96 (8.5%)          |
| <p>Values are displayed as N (%) where N represents the number of GIP tests. GIP, FilmArray GIP. Targets include bacteria: <i>Campylobacter</i>, <i>C. difficile</i> (toxin A/B), <i>Plesiomonas shigelloides</i>, <i>Salmonella</i>, <i>Yersinia enterocolitica</i>, <i>Vibrio</i> (parahaemolyticus, vulnificus, and cholerae), <i>Vibrio cholera</i>, diarrheagenic <i>Escherichia coli/Shigella</i> including enteroaggregative <i>Escherichia coli</i>, enteropathogenic <i>Escherichia coli</i>, enterotoxigenic <i>Escherichia coli</i>, Shiga-like toxin-producing <i>Escherichia coli</i> Shiga toxin 1/Shiga toxin 2 (including <i>Escherichia coli</i> 0157), and <i>Shigella/enteroinvasive Escherichia coli</i>; viruses: Adenovirus F 40/41, astrovirus, norovirus GI/GII, rotavirus A, and sapovirus (I, II, IV, and V); parasites: <i>Cryptosporidium</i>, <i>Cyclospora cayetanensis</i>, <i>Entamoeba histolytica</i>, and <i>Giardia lamblia</i>. <i>E. coli</i>, <i>Escherichia coli</i>. Boldface indicates <math>P &lt; 0.05</math>.</p> <p><sup>a</sup> Given high rates of asymptomatic carriage, our laboratory does not report detection of enteroaggregative, enteropathogenic, and enterotoxigenic strains of <i>Escherichia coli</i> in patients of any age and <i>C. difficile</i> in patients aged &lt;12 months.</p> |                    |

**SUPPLEMENTAL TABLE 5** Non-CCC Cohort: Sensitivity Analyses for Multivariable Logistic Regression Analysis

| Non-CCC Variable <sup>a</sup> | Non-C. Diff Bacteria and Parasites as Actionable <sup>c</sup> |                 | C. Diff Nonactionable for <2 y <sup>d</sup> |                 | C. Diff Nonactionable for <3 y <sup>e</sup> |                 | C. Diff Nonactionable When Codetected With Virus <sup>f</sup> |                 |
|-------------------------------|---------------------------------------------------------------|-----------------|---------------------------------------------|-----------------|---------------------------------------------|-----------------|---------------------------------------------------------------|-----------------|
|                               | RR (95% CI)                                                   | P               | RR (95% CI)                                 | P               | RR (95% CI)                                 | P               | RR (95% CI)                                                   | P               |
| Age (y)                       |                                                               |                 |                                             |                 |                                             |                 |                                                               |                 |
| <1                            | 1                                                             | —               | 1                                           | —               | 1                                           | —               | 1                                                             | —               |
| 1–2                           | 2.36 (1.2–4.63)                                               | <b>.012</b>     | 2.08 (1.07–4.07)                            | <b>.032</b>     | 2.08 (1.06–4.06)                            | <b>.033</b>     | 3.01 (1.62–5.61)                                              | <b>&lt;.001</b> |
| 2–5                           | 2.75 (1.52–4.95)                                              | <b>&lt;.001</b> | 3.38 (1.89–6.03)                            | <b>&lt;.001</b> | 3 (1.66–5.43)                               | <b>&lt;.001</b> | 2.85 (1.57–5.18)                                              | <b>&lt;.001</b> |
| ≥5                            | 2.18 (1.24–3.85)                                              | <b>.007</b>     | 3.62 (2.08–6.29)                            | <b>&lt;.001</b> | 3.63 (2.09–6.3)                             | <b>&lt;.001</b> | 3.36 (1.93–5.83)                                              | <b>&lt;.001</b> |
| Season                        |                                                               |                 |                                             |                 |                                             |                 |                                                               |                 |
| Winter                        | 1                                                             | —               | 1                                           | —               | 1                                           | —               | 1                                                             | —               |
| Spring                        | 2.54 (1.26–5.11)                                              | <b>.009</b>     | 1.66 (1–2.74)                               | <b>.049</b>     | 1.54 (0.93–2.56)                            | .096            | 1.55 (0.94–2.54)                                              | .084            |
| Summer                        | 3.82 (1.95–7.48)                                              | <b>&lt;.001</b> | 2.26 (1.39–3.66)                            | <b>.001</b>     | 2.16 (1.33–3.51)                            | <b>.002</b>     | 2.07 (1.29–3.32)                                              | <b>.003</b>     |
| Fall                          | 2.8 (1.38–5.69)                                               | <b>.004</b>     | 1.78 (1.07–2.96)                            | <b>.026</b>     | 1.75 (1.06–2.9)                             | <b>.03</b>      | 1.63 (0.99–2.68)                                              | .053            |
| ICU admission                 | 1.14 (0.7–1.85)                                               | .59             | 0.99 (0.65–1.5)                             | .94             | 1.02 (0.67–1.56)                            | .94             | 1.04 (0.68–1.59)                                              | .87             |
| ≥4 stools per d               | 1.61 (1.05–2.48)                                              | <b>.03</b>      | 1.24 (0.89–1.72)                            | .2              | 1.26 (0.9–1.75)                             | .17             | 1.29 (0.92–1.8)                                               | .14             |
| Order indication <sup>b</sup> |                                                               |                 |                                             |                 |                                             |                 |                                                               |                 |
| All other indications         | 1                                                             | —               | 1                                           | —               | 1                                           | —               | 1                                                             | —               |
| Diarrhea with blood or pus    | 2.41 (1.53–3.78)                                              | <b>&lt;.001</b> | 1.62 (1.12–2.33)                            | <b>.01</b>      | 1.59 (1.1–2.3)                              | <b>.014</b>     | 1.6 (1.11–2.31)                                               | <b>.012</b>     |
| Severe water-loss diarrhea    | 0.92 (0.5–1.68)                                               | .79             | 0.86 (0.54–1.35)                            | .51             | 0.82 (0.52–1.31)                            | .41             | 0.68 (0.41–1.11)                                              | .12             |
| International travel          | 3.06 (1.69–5.54)                                              | <b>&lt;.001</b> | 1.64 (0.95–2.84)                            | .076            | 1.66 (0.96–2.87)                            | .07             | 1.73 (1.01–2.96)                                              | <b>.046</b>     |
| Epi/surveillance testing      | 0.41 (0.06–2.91)                                              | .38             | 0.23 (0.03–1.56)                            | .13             | 0.23 (0.03–1.54)                            | .13             | 0.22 (0.03–1.5)                                               | .12             |
| Other                         | 0.78 (0.41–1.51)                                              | .47             | 0.88 (0.56–1.38)                            | .58             | 0.85 (0.53–1.34)                            | .48             | 0.89 (0.56–1.42)                                              | .62             |

CI, confidence interval; epi, epidemiologic. —, no value. Boldface indicates  $P < 0.05$ .

<sup>a</sup> The variables age, sex, seasonality, ICU admission, and number of daily stools were determined a priori to be included in the multivariable logistic regression models.

<sup>b</sup> Individual order indications included in this regression model are the same as the order indications included in the original model (Table 3, independent variable = actionable result) to maintain consistency. Individual order indications were originally included in the original model if they were associated with actionable results in bivariate analyses with a  $P$  value  $< .2$ .

<sup>c</sup> In this model, an actionable result is defined as detection of at least 1 non-*C. difficile* bacteria or parasite.

<sup>d</sup> In this model, *C. difficile* is not considered an actionable result for patients aged  $< 2$  years.

<sup>e</sup> In this model, *C. difficile* is not considered an actionable result for patients aged  $< 3$  years.

<sup>f</sup> In this model, *C. difficile* is not considered an actionable result if a virus is also codetected on GP.

**SUPPLEMENTAL TABLE 6** CCC Cohort: Sensitivity Analyses for Multivariable Logistic Regression Analysis

| CCC Variable <sup>a</sup>     | Non- <i>C. Diff</i> Bacteria and Parasites as Actionable <sup>c</sup> |             | <i>C. Diff</i> Nonactionable for <2 y <sup>d</sup> |                 | <i>C. Diff</i> Nonactionable for <3 y <sup>e</sup> |                 | <i>C. Diff</i> Nonactionable When Codetected With Virus <sup>f</sup> |             |
|-------------------------------|-----------------------------------------------------------------------|-------------|----------------------------------------------------|-----------------|----------------------------------------------------|-----------------|----------------------------------------------------------------------|-------------|
|                               | RR (95% CI)                                                           | P           | RR (95% CI)                                        | P               | RR (95% CI)                                        | P               | RR (95% CI)                                                          | P           |
| Age (y)                       |                                                                       |             |                                                    |                 |                                                    |                 |                                                                      |             |
| <1                            | 1                                                                     | —           | 1                                                  | —               | 1                                                  | —               | 1                                                                    | —           |
| 1–2                           | 0.92 (0.24–3.55)                                                      | .91         | 1.04 (0.27–4.05)                                   | .95             | 1.07 (0.28–4.18)                                   | .92             | 2.88 (0.94–8.77)                                                     | .063        |
| 2–5                           | 0.83 (0.21–3.28)                                                      | .79         | 7.06 (2.57–19.42)                                  | <b>&lt;.001</b> | 4.15 (1.43–12.07)                                  | <b>.009</b>     | 3.38 (1.14–10)                                                       | <b>.028</b> |
| ≥5                            | 1.36 (0.45–4.05)                                                      | .58         | 5.53 (2.04–15.02)                                  | <b>&lt;.001</b> | 5.72 (2.1–15.62)                                   | <b>&lt;.001</b> | 4.75 (1.73–13.02)                                                    | <b>.003</b> |
| Season                        |                                                                       |             |                                                    |                 |                                                    |                 |                                                                      |             |
| Winter                        | 1                                                                     | —           | 1                                                  | —               | 1                                                  | —               | 1                                                                    | —           |
| Spring                        | 1.05 (0.4–2.77)                                                       | .91         | 0.85 (0.53–1.36)                                   | .49             | 0.89 (0.54–1.46)                                   | .64             | 0.98 (0.56–1.71)                                                     | .93         |
| Summer                        | 1.79 (0.7–4.55)                                                       | .22         | 1.03 (0.64–1.68)                                   | .89             | 0.99 (0.59–1.67)                                   | .97             | 1.2 (0.68–2.11)                                                      | .54         |
| Fall                          | 0.67 (0.21–2.17)                                                      | .51         | 1.06 (0.66–1.7)                                    | .8              | 0.85 (0.49–1.47)                                   | .56             | 1.18 (0.68–2.06)                                                     | .56         |
| ICU admission                 | 0.42 (0.19–0.94)                                                      | <b>.034</b> | 0.68 (0.47–0.99)                                   | <b>.047</b>     | 0.73 (0.48–1.09)                                   | .12             | 0.78 (0.51–1.19)                                                     | .25         |
| ≥4 stools per d               | 0.8 (0.4–1.6)                                                         | .53         | 0.72 (0.51–1.01)                                   | .058            | 0.67 (0.46–0.97)                                   | <b>.036</b>     | 0.91 (0.6–1.37)                                                      | .64         |
| Order indication <sup>b</sup> |                                                                       |             |                                                    |                 |                                                    |                 |                                                                      |             |
| All other indications         | 1                                                                     | —           | 1                                                  | —               | 1                                                  | —               | 1                                                                    | —           |
| Diarrhea with blood or pus    | 1.62 (0.68–3.87)                                                      | .27         | 1.43 (0.91–2.23)                                   | .12             | 1.28 (0.77–2.13)                                   | .35             | 1.29 (0.76–2.19)                                                     | .35         |

CI, confidence interval. —, no value. Boldface indicates  $P < 0.05$ .

<sup>a</sup> The variables age, sex, seasonality, ICU admission, and number of daily stools were determined a priori to be included in the multivariable logistic regression models.

<sup>b</sup> Individual order indications included in this regression model are the same as the order indications included in the original model (Table 3, independent variable = actionable result) to maintain consistency. Individual order indications were originally included in the original model if they were associated with actionable results in bivariate analyses with a  $P$  value  $< .2$ .

<sup>c</sup> In this model, an actionable result is defined as detection of at least 1 non-*C. difficile* bacteria or parasite.

<sup>d</sup> In this model, *C. difficile* is not considered an actionable result for patients aged <2 years.

<sup>e</sup> In this model, *C. difficile* is not considered an actionable result for patients aged <3 years.

<sup>f</sup> In this model, *C. difficile* is not considered an actionable result if a virus is also codetected on GIP.

| <b>SUPPLEMENTAL TABLE 7</b> Median Number of Patient Stools Reported in the Last 24 Hours, by GIP Result Type |                                        |                                |                            |
|---------------------------------------------------------------------------------------------------------------|----------------------------------------|--------------------------------|----------------------------|
| <b>Result Type</b>                                                                                            | <b>All Encounters, <i>N</i> = 1110</b> | <b>Non-CCC, <i>N</i> = 507</b> | <b>CCC, <i>N</i> = 603</b> |
| Actionable result                                                                                             | 5 (3–8)                                | 5 (3–8)                        | 4 (3–6)                    |
| Nonactionable result (virus only)                                                                             | 5 (3–8)                                | 5 (3–8)                        | 5 (3–8)                    |
| No pathogen detected                                                                                          | 5 (3–7)                                | 5 (3–8)                        | 5 (3–6)                    |

*N* represents the number of GIP tests with documented number of stools. Values are displayed as median (interquartile range).
